# Supplementary material for: Painless and sensitive pepsinogen I detection: an electrochemical immunosensor based on rhombic dodecahedral Cu3Pt and MoS2 NFs
Source: Royal Society of Chemistry journal article supplement (doi:10.1039/d2na00556e), 2022-11-30
Supplement: d2na00556e1.pdf [file d2na00556e1.pdf]

## Supporting information

# Painless and sensitive Pepsinogen I detection: an electrochemical immunosensor based on rhombic dodecahedral Cu<sub>3</sub>Pt and MoS<sub>2</sub> NFs

Shanshan Wei<sup>1</sup>, Shiyong Li<sup>1</sup>, Haolin Xiao<sup>1,2</sup>, Feijun Zhao<sup>2</sup>, Jianming Zhu<sup>2</sup>, Zhencheng Chen<sup>1,2,\*</sup>, Liangli Cao<sup>2\*</sup>

1. School of Electronic Engineering and Automation, Guilin University of Electronic Technology, Guilin 541004, China

2. School of Life and Environmental Sciences, Guilin University of Electronic Technology, Guilin 541004, China

\*Corresponding authors: [chenzhcheng@163.com](mailto:chenzhcheng@163.com) (Zhencheng Chen), [caoliangli216@163.com](mailto:caoliangli216@163.com) (Liangli Cao)

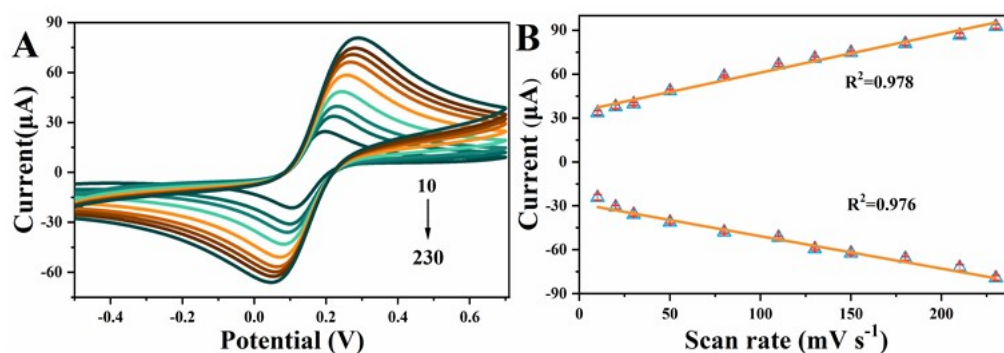

Fig.S1. (A) CVs of the immunosensor at different scan rates; 10, 20, 30, 50, 80, 110, 130, 150, 180, 210 and 230 mV s<sup>-1</sup> in a 5 mM Fe(CN)<sub>6</sub><sup>3-/4-</sup> solution (B) The linear relationship between the peak currents and the scan rate.

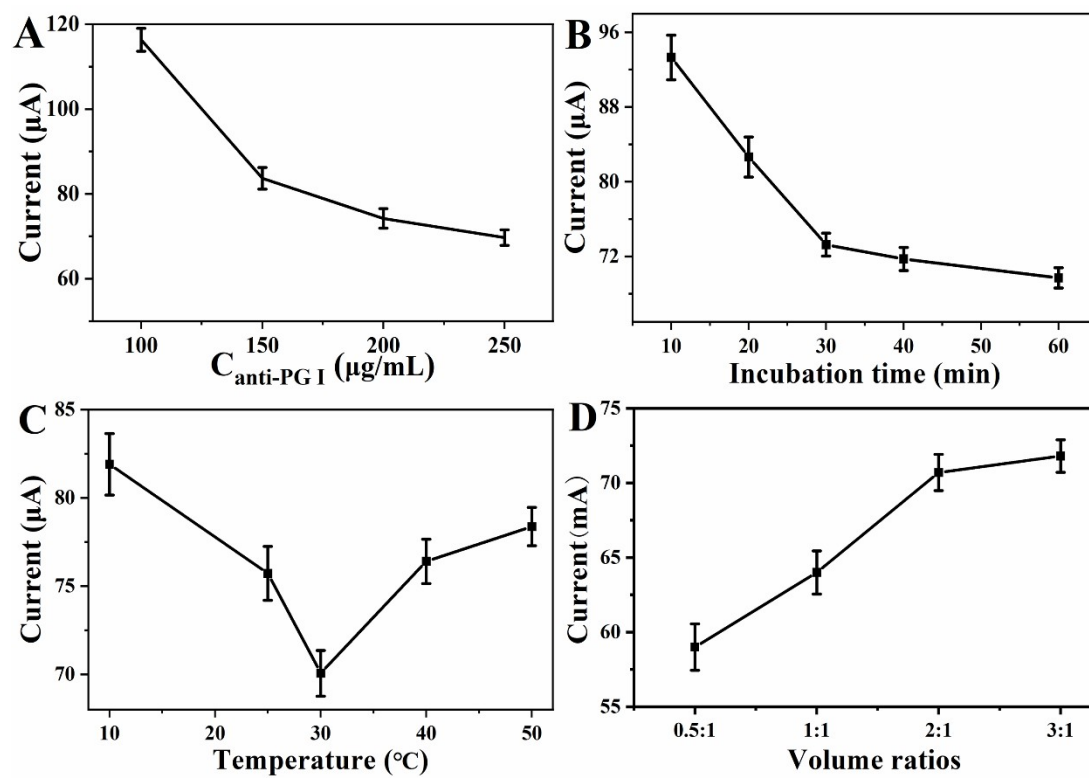

Fig. S2. The effect of the (A) concentration of anti-PG I, (B) incubation time, (C) incubation temperature and (D) concentration of  $\text{MoS}_2@\text{Cu}_3\text{Pt}$  NPs on peak currents of the proposed immunosensor.
